# Supplementary material for: The Efficacy and Safety of Miconazole Nitrate Mucoadhesive Tablets versus Itraconazole Capsules in the Treatment of Oral Candidiasis: An Open-Label, Randomized, Multicenter Trial
Source: PubMed Central journal article supplement (PMC5157999; doi:10.1371/journal.pone.0167880), 2016-12-15
Supplement: pone.0167880.s001.pdf [file pone.0167880.s001.pdf]

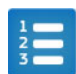

Trial search

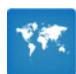Nation,  
Province(City)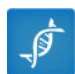Code of  
disease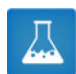Primary  
sponsor(s)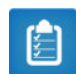Secondary  
sponsor(s)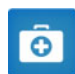Funding  
source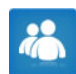Recruiting  
status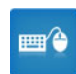Register  
status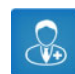

Measure

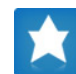Ethical  
committee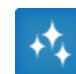

Study type

## An evaluation on the efficacy and safety of topical oral miconazole nitrate paste in the treatment of oral candidiasis: a randomized, open label, positive controlled, multicenter clinical trial

Registration number: ChiCTR-TRC-13003935

Date of releasing the registration number: 2013/12/03

Registration Status: Retrospective registration

Public title: An evaluation on the efficacy and safety of topical oral miconazole nitrate paste in the treatment of oral candidiasis: a randomized, open label, positive controlled, multicenter clinical trial

Scientific title: An evaluation on the efficacy and safety of topical oral miconazole nitrate paste in the treatment of oral candidiasis: a randomized, open label, positive controlled, multicenter clinical trial

Secondary ID:

Applicant: Zhimin Yan

Study leader: Hong Hua

Applicant telephone: +86 10 82195349

Study leader's telephone: +86 10 82195349

Applicant Fax: +86 10 62173402

Study leader's fax: +86 10 62173402

Applicant E-mail: yzhimin@gmail.com

Study leader's E-mail: honghua1968@yahoo.com.cn

Applicant website(voluntary supply):

Study leader's website(voluntary supply):

Applicant address: 22 Zhongguancun Nandajie, Haidian District, Beijing

Study leader's address: 22 Zhongguancun Nandajie, Haidian District, Beijing

Applicant postcode: 100081

Study leader's postcode: 100081

Applicant's institution: Peking University School and Hospital of Stomatology

Approved by ethic committee: Yes

Approved No. of ethic committee: (2009) 伦申第 (03) 号

Approved file of Ethical Committee: [查看附件View](#)

Name of the ethic committee: Ethic Committee of Peking University Health Science Center

Date of approved by ethic committee: 2009/09/15

Primary sponsor: Peking University School and Hospital of Stomatology

Primary sponsor's address: 22 Zhongguancun Nandajie, Haidian District, Beijing

|          |       |           |           |       |          |
|----------|-------|-----------|-----------|-------|----------|
| Country: | China | Province: | Guangdong | City: | Shenzhen |
|----------|-------|-----------|-----------|-------|----------|

|                    |                       |                                |          |                                              |
|--------------------|-----------------------|--------------------------------|----------|----------------------------------------------|
| Secondary sponsor: | Institution hospital: | JIAN AN PHARMACEUTICAL LIMITED | Address: | No.1016 Shangbu Middle Road, Futian District |
|--------------------|-----------------------|--------------------------------|----------|----------------------------------------------|

Source(s) of funding: Hangzhou Tigermed Consulting Co., Ltd

Target disease: Oral Candidiasis

Target disease code:

Study type: Interventional

Study phase: Phase III

Objectives of Study: To evaluate the efficacy and safety of topical oral miconazole nitrate paste in the treatment of oral candidiasis.

Study design: Randomized parallel control

The inclusion criteria were: 1) age range of 18-70 years; 2) diagnosis of oral candidiasis was established based on clinical manifestation and

Inclusion criteria laboratory testing (smear test and fungi culture); 3) patients with positive smear test are eligible for instant enrollment; 4) positive rate of fungi culture>80%; 5) negative reaction to pregnancy test in women and willing to take effective method of birth control in the period of trial; 6) voluntarily participating and Informed Consent Form being signed.

Exclusion criteria: 1) diagnosis of cryptococcosis or other systemic fungal infections; 2) a history of a known allergy or intolerance to miconazole nitrate and/or itroconazole; 3) use of rifampicin, rifabutin, isoniazid, phenobarbital, phenytoin, methylprednisolone, carbamazepine, terfenadine, astemizole or cisapride; 4) history of pregnancy or breast-feeding; 5) history of psychological disorder that enable to cooperate; 6) hepaticinsufficiency with serum aminotransferase and total bilirubin levels at 1.5 times the upper limit of normal, or active clinical signs 2 months prior to the trial; 7) serum creatinine levels at 1.5 times the upper limit of normal; 8) history of cardiac insufficiency such as ischemic heart failure; 9) history of hematological diseases; 10) use of systemic or topical antifungal therapy within 2 weeks before study entry ( patients received topical treatment with miconazole nitrate or nystatin cream or suppositor remain eligible for enrollment in the study); 11) diagnosis of chronic mucocutaneous candidiasis; 12) hyposalivation related disease or drug-taking; 13) HIV positive; 14) history of participating other clinical trials within 4 weeks before study entry.

Study execute time: From2009-2-26To 2012-12-5

|               |                                                                            |                    |     |
|---------------|----------------------------------------------------------------------------|--------------------|-----|
| Group:        | miconazole nitrate group                                                   | Sample size:       | 190 |
| Intervention: | miconazole nitrate sustained release oral paste for topical use once a day | Intervention code: |     |
| Group:        | Itroconazole group                                                         | Sample size:       | 190 |
| Intervention: | Itroconazole capsule 100mg QD P.O.                                         | Intervention code: |     |

|                       |                                                                                        |                           |                     |       |          |
|-----------------------|----------------------------------------------------------------------------------------|---------------------------|---------------------|-------|----------|
| Country:              | China                                                                                  | Province:                 | Beijing             | City: |          |
| Institution hospital: | Peking University School and Hospital of Stomatology                                   | Level of the institution: | Tertiary A hospital |       |          |
| Country:              | China                                                                                  | Province:                 | Sichuan             | City: | Chengdu  |
| Institution hospital: | West China School of Stomatology, Sichuan University                                   | Level of the institution: | Tertiary A hospital |       |          |
| Country:              | China                                                                                  | Province:                 | Jiangsu             | City: | Nanjing  |
| Institution hospital: | Institute and Hospital of Dentistry, Nanjing University Medical School                 | Level of the institution: | Tertiary A hospital |       |          |
| Country:              | China                                                                                  | Province:                 | Hubei               | City: | Huhan    |
| Institution hospital: | Tongji Hospital, Tongji Medical College, Huazhong University of Science and Technology | Level of the institution: | Tertiary A hospital |       |          |
| Country:              | China                                                                                  | Province:                 | Hubei               | City: | Wuhan    |
| Institution hospital: | Wuhan Union Hospital, Huazhong University of Science and Technology                    | Level of the institution: | Tertiary A hospital |       |          |
| Country:              | China                                                                                  | Province:                 | Shanxi              | City: | Xi'an    |
| Institution hospital: | College of Stomatology, the Fourth Military Medical University                         | Level of the institution: | Grade III           |       |          |
| Country:              | China                                                                                  | Province:                 | Liaoning            | City: | Shenyang |
| Institution hospital: | Hospital of Stomatology, China Medical University                                      | Level of the institution: | Tertiary A hospital |       |          |
| Country:              | China                                                                                  | Province:                 | Beijing             | City: | Beijing  |
| Institution hospital: | Stomatological Hospital, Capital Medical University                                    | Level of the institution: | Tertiary A hospital |       |          |

|          |                                                             |
|----------|-------------------------------------------------------------|
| Outcome: | Clinical symptoms rating (Pain and burning sensation level) |
| Outcome: | Clinical sign rating(pseudomenbran and erythema)            |
| Outcome: | candida elimination rate                                    |
| Outcome: | ECG                                                         |
| Outcome: | CBC                                                         |
| Outcome: | Biochemical Examination                                     |

|                                                                                                                 |                 |                              |                                                    |
|-----------------------------------------------------------------------------------------------------------------|-----------------|------------------------------|----------------------------------------------------|
| Collecting sample(s) from participants:                                                                         | Sample Name:    | Blood                        | Tissue:                                            |
|                                                                                                                 | Fate of sample: | <b>Destruction after use</b> | Note:                                              |
|                                                                                                                 | Sample Name:    | Saliva                       | Tissue:                                            |
|                                                                                                                 | Fate of sample: | <b>Destruction after use</b> | Note:                                              |
| Recruiting status: Completed                                                                                    |                 | Participant age:             | Min age <b>19</b> years<br>Max age <b>70</b> years |
| Randomization Procedure (please state who generates the random number sequence and by what method):<br>computer |                 | Gender:                      | Both                                               |
| Blinding:                                                                                                       |                 |                              |                                                    |
| Calculated Results after the Study Completed:                                                                   |                 |                              |                                                    |
| Organizer institution (leader institution):                                                                     |                 |                              |                                                    |
| Data collection Institution:                                                                                    |                 |                              |                                                    |
| Data management Institution:                                                                                    |                 |                              |                                                    |
| Data analysis Institution:                                                                                      |                 |                              |                                                    |

[Return to list](#)

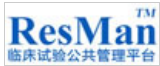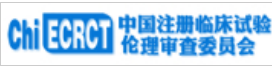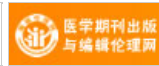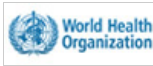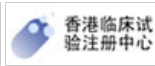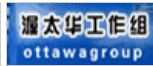

[Home](#) | [About ChiCTR](#) | [Trial Search](#) | [Document](#) | [Reg guide](#) | [Question](#)

The world health organization international clinical trials registered organization registered platform

Copyright(c) (2005 - 2011) Chictr.org.All rights reserved. The Chinese clinical test registration center

Support: 543 social work center

蜀ICP备07505307号

Tips: it is recommended to use more than IE8.0 widescreen display resolution version using system.

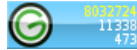

站长统计
